# Supplementary material
Source: Springer Nature journal article supplement (https://www.springermedizin.de/resource/supplementary/12888_2008_514_MOESM5_ESM.pdf/9483474)

Suicide ideation (lifetime prevalence) in men and women

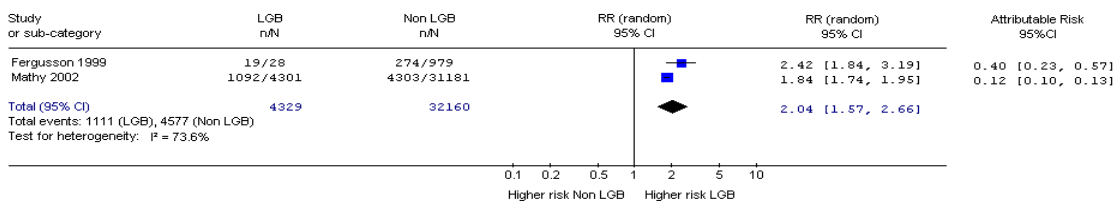

Suicide ideation (lifetime prevalence) in men only

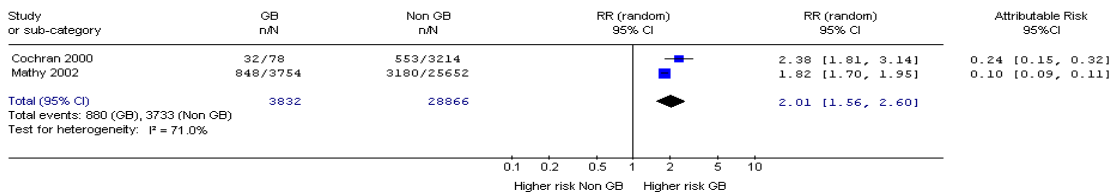

Suicide ideation (lifetime prevalence) in women only

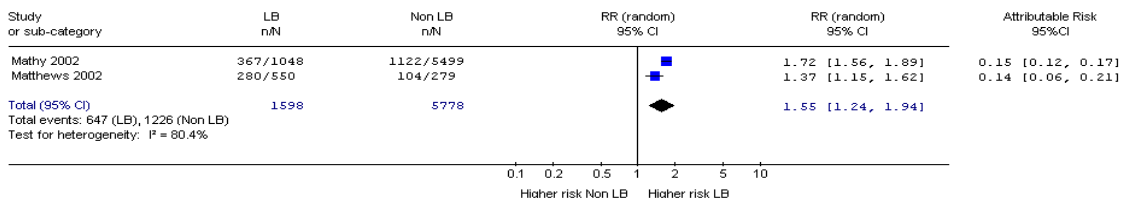

Suicide ideation (12 month prevalence) in men and women

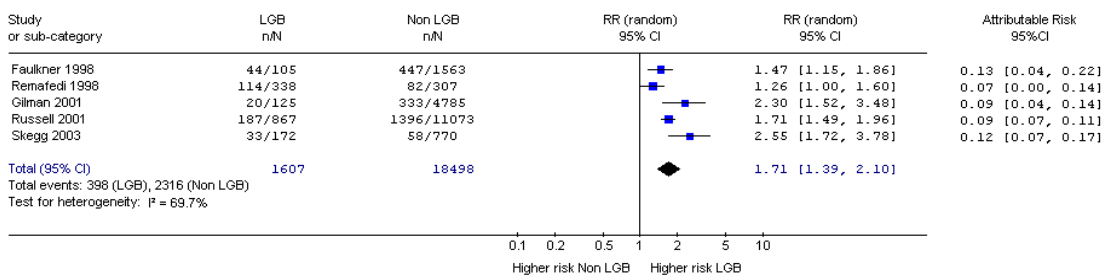

Suicide ideation (12 month prevalence) in men only

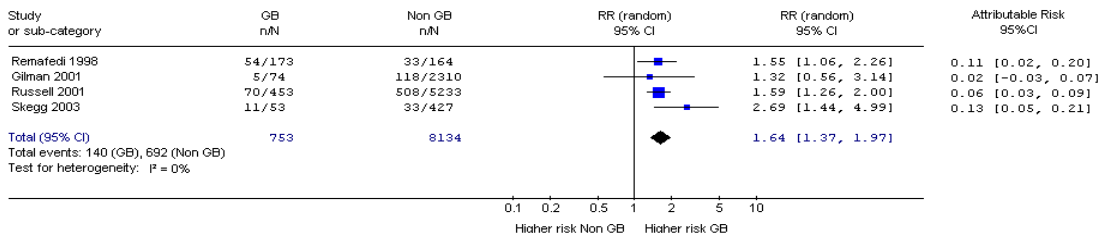

Suicide ideation (12 month prevalence) in women only

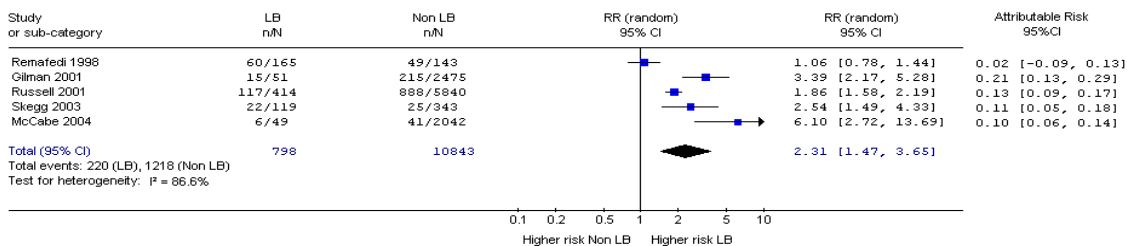

Supplement: MOESM5 [file 9483474]
